# Supplementary material for: Disentangling controls of multi-scale variability in Precipitation Stable Isotopes at Yadong and Ali on the Tibetan Plateau
Source: Copernicus journal article supplement (doi:10.5194/egusphere-2025-3567), 2025-08-14
Supplement: Supplementary file 1 [file egusphere-2025-3567-supplement.pdf]

# **Disentangling controls of multi-scale variability in Precipitation**

## **Stable Isotopes at Yadong and Ali on the Tibetan Plateau**

Ke Li<sup>1,2</sup>, Jing Gao<sup>1,3</sup> \*, Jingjing Yang<sup>3</sup>, Xiaowei Niu<sup>1</sup>, Aibin Zhao<sup>1</sup>,

Gebanruo Chen<sup>1,2</sup>, Yuqing Wu<sup>1,2</sup>, Yigang Liu<sup>1,2</sup>

<sup>1</sup>State Key Laboratory of Tibetan Plateau Earth System, Environment and Resources (TPESER), Institute of Tibetan Plateau Research, Chinese Academy of Sciences, Beijing, 100101, China.

<sup>2</sup>University of Chinese Academy of Sciences, Beijing, 100049, China

<sup>3</sup>Center for the Pan-Third Pole Environment, Lanzhou University, Lanzhou 730000, China

\* *Correspondence to:* Jing Gao (gaojing@itpcas.ac.cn)

**Table S1 Daily minimum, maximum, and weighted average values of  $\delta^{18}\text{O}$ ,  $\delta\text{D}$ , and d-excess at Yadong and Ali in different seasons**

|              |                           | Yadong  |        |       | Ali      |         |        |        |          |
|--------------|---------------------------|---------|--------|-------|----------|---------|--------|--------|----------|
|              |                           | Samples | min    | max   | weighted | Samples | min    | max    | weighted |
|              |                           | (n)     |        |       | average  | (n)     |        |        | average  |
| Year         | $\delta^{18}\text{O}$ (‰) | 359     | -25.7  | 7.2   | -9.5     | 80      | -35.0  | 7.3    | -15.0    |
|              | $\delta\text{D}$ (‰)      |         | -190.4 | 58.1  | -64.6    |         | -264.7 | 68.0   | -104.6   |
|              | d-excess (‰)              |         | -28.4  | 29.5  | 11.4     |         | -18.2  | 32.6   | 15.6     |
| Pre-monsoon  | $\delta^{18}\text{O}$ (‰) | 106     | -12.9  | 7.2   | -2.7     | 5       | -21.5  | -6.2   | -8.4     |
|              | $\delta\text{D}$ (‰)      |         | -92.4  | 58.1  | -6.6     |         | -162.1 | -24.5  | -46.0    |
|              | d-excess (‰)              |         | -1.2   | 25.7  | 15.3     |         | 5.2    | 25.0   | 20.9     |
| Monsoon      | $\delta^{18}\text{O}$ (‰) | 215     | -22.4  | 6.2   | -10.7    | 66      | -25.7  | 7.3    | -13.3    |
|              | $\delta\text{D}$ (‰)      |         | -170.3 | 39.3  | -78.6    |         | -194.4 | 68.0   | -92.4    |
|              | d-excess (‰)              |         | -28.4  | 17.5  | 6.7      |         | -18.2  | 32.6   | 14.0     |
| Late monsoon | $\delta^{18}\text{O}$ (‰) | 20      | -25.7  | -6.6  | -22.9    | 3       | -34.6  | -19.6  | -26.7    |
|              | $\delta\text{D}$ (‰)      |         | -190.4 | -55.0 | -170.1   |         | -257.3 | -126.7 | -188.5   |
|              | d-excess (‰)              |         | -19.7  | 15.6  | 13.1     |         | 13.6   | 30.2   | 24.7     |
| Westerlies   | $\delta^{18}\text{O}$ (‰) | 18      | -17.2  | 1.7   | -9.6     | 6       | -35.0  | -13.7  | -21.8    |
|              | $\delta\text{D}$ (‰)      |         | -121.6 | 34.2  | -57.1    |         | -264.7 | -123.3 | -175.9   |
|              | d-excess (‰)              |         | 14.7   | 29.5  | 19.9     |         | -13.5  | 15.4   | -1.5     |

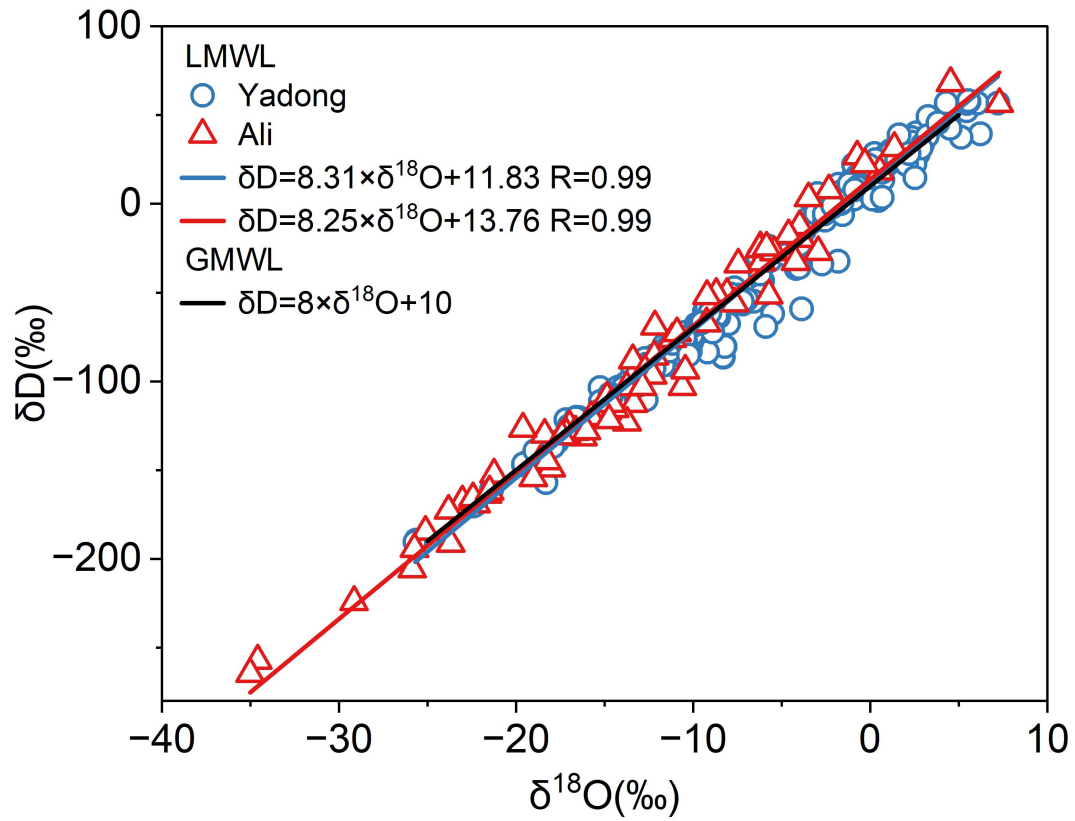

**Figure S1 Local Meteoric Water Line for Yadong and Ali and Global Meteoric Water Line throughout the year.**

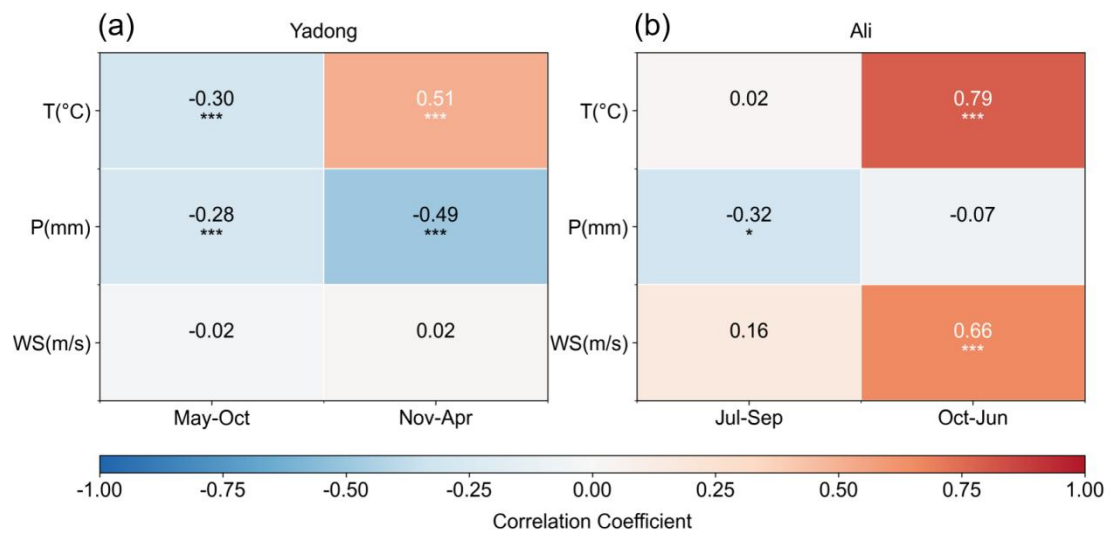

**Figure S2 A heat map of the relationship between (a) Yadong  $\delta^{18}O$  and temperature (T), precipitation (P), and wind speed (WS) in different seasons. (b) same as (a), but for Ali. \*\*\* and \* indicate significant correlation at levels 0.001 and 0.05, respectively.**

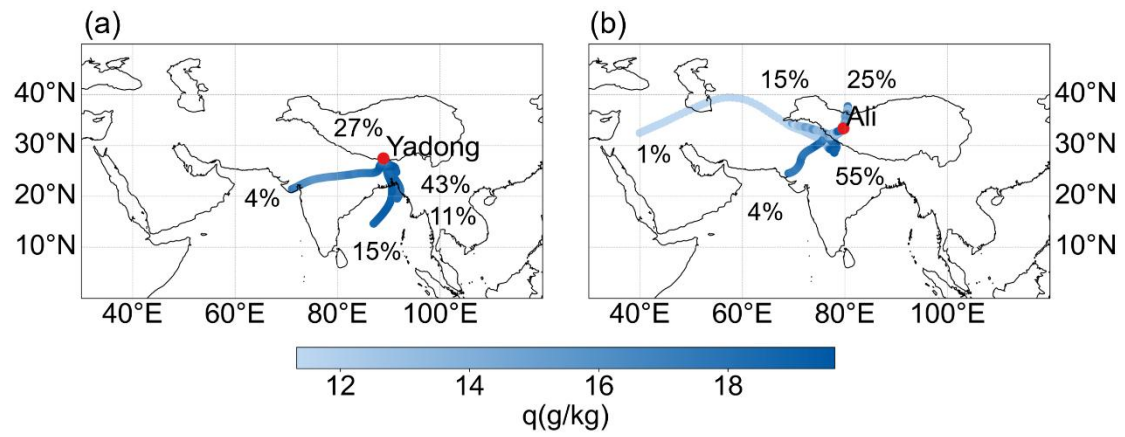

**Figure S3 Backward trajectories on simultaneous rainy days at Yadong (a) and Ali (b) during the monsoon season.**
